# Supplementary material
Source: publisher figshare collection journal article supplement (https://sage.figshare.com/ndownloader/files/11407961)
Supplement: Supplementary file 1 [file 11407961]

**Table S3:** Pre-Post analyses: unadjusted means and standard errors for outcomes at all three study visits for CATCH study participants.

| <b>Outcome Name, Instrument Acronym (value range)<sup>1</sup></b> | <b>Baseline</b> | <b>3-months</b> | <b>6-months</b> |
|-------------------------------------------------------------------|-----------------|-----------------|-----------------|
| Physical component score, SF36-PCS (0 to 100)                     | 47.4 (0.7)      | 47.8 (0.8)      | 48.9 (0.8)      |
| Mental component scores, SF36-MCS (0 to 100)                      | 29.0 (0.9)      | 33.5 (0.9)      | 36.0 (1.0)      |
| Mental health symptoms, CSI (14 to 70)                            | 42.0 (0.7)      | -               | 34.7 (0.8)      |
| Quality of life, QOLI20 total score (20 to 140)                   | 71.4 (1.5)      | -               | 81.6 (1.7)      |
| Alcohol component, ASI ACOMP (0 to 1)                             | 0.19 (0.02)     | -               | 0.15 (0.01)     |
| Drug component, ASI DCOMP (0 to 1)                                | 0.08 (0.01)     | -               | 0.05 (0.01)     |
| Number of hospital admissions in past 3 months                    | 0.58 (0.04)     | 0.42 (0.06)     | 0.35 (0.06)     |
| Number of ED Visits in past 3 months                              | 2.07 (0.21)     | 2.00 (0.28)     | 1.71 (0.31)     |
| Number of days homeless in past 3 months                          | 52.11 (2.21)    | 54.73 (2.45)    | 51.01 (2.98)    |

<sup>1</sup> Value ranges are only available for standardized instruments. Higher values are associated with better outcomes for SF36-PCS, SF36-MCS and QOLI-20 total score, and with poorer outcomes for the ASI and the CSI..
